# Supplementary material for: Modeling ZNF408-Associated FEVR in Zebrafish Results in Abnormal Retinal Vasculature
Source: PubMed Central journal article supplement — Invest Ophthalmol Vis Sci. 2020 Feb 25;61(2):39. doi: 10.1167/iovs.61.2.39 (PMC7329629; doi:10.1167/iovs.61.2.39), 2020-02-25
Supplement: iovs-61-2-39_s001.pdf [file iovs-61-2-39_s001.pdf]

1 60  
 Danio rerio\_znf408 (1) -----MSTVTCGRN---EGSGNKRDSIHS-----ALRSVPLG  
 Homo sapiens\_ZNF408 (1) MEEAEELLEGKKALQLAREPRLGLDLCWNPSEGECTQGLKDVPEPTRDILALKSLPRG

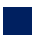

61 120  
 Danio rerio\_znf408 (29) LTVGPSLAEDEQLGLWCVGRVLLKKTLLGLEEPGETISKEKEEGLQNASQSVYKREISDE  
 Homo sapiens\_ZNF408 (61) LALGPSLAKAQRLGVWCVGDPLQPGLLWGPLEE-ESASKEKGEVVKPRQEENLSLGPWGD

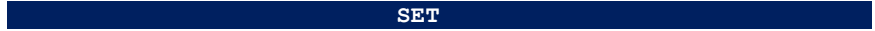

121 180  
 Danio rerio\_znf408 (89) VCWMQFACSAQSAE-----ESNVSVLKVDGRLGLKVCARDIQPTPELLWESHPEAVTE  
 Homo sapiens\_ZNF408 (120) VCACEQSSGWTSLVQRGRLESEGNVAPVRISERLHLQVYQLVLPQSELLWQPSPSEGPS

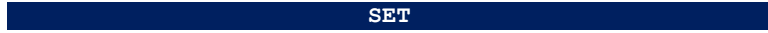

181 240  
 Danio rerio\_znf408 (142) EETPQVETCENREQDEAL EANTSDHFSGSPYLLQRVTQD TKS FVTVKGLVQDNTICNSN  
 Homo sapiens\_ZNF408 (180) LTQPLGLDKEAAVAVVTEVE SAVQQEVASP-----GEDAAEPCIDPFGSQSPSGIQAEN

241 300  
 Danio rerio\_znf408 (202) VLEQNGMEESEAEHSDELPAEEIESINVSASQAQTSSCLTPERSLRTSSRLASKPRKV  
 Homo sapiens\_ZNF408 (232) MVSPGLKFPQTDRISKDSQPLGPLLQDGDVDEECPAQACMPPELOSNATQQDPDGSAS

301 360  
 Danio rerio\_znf408 (262) HSSAKFIYKRHDPKNKPDLSKKKLLNSKDLMQPLTVKEESSTKQNGQDFPFNIR---  
 Homo sapiens\_ZNF408 (292) FSSSARGTQPHG-----YLAKKLHSPSDQCPRAKTPEPGAQOSCFPTLSRSPPG

361 420  
 Danio rerio\_znf408 (319) -----E---RKYKCECDKSEFFQLCHLKKHKYTHQNKPYTCTECGKSYSSHESFAHLL  
 Homo sapiens\_ZNF408 (342) PAGSSPKQGRYRCEGEGKAFQLCHLKKHAFVHTGHKPFCLTECGKSYSSSEESFAHML

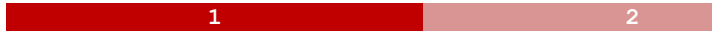

421 480  
 Danio rerio\_znf408 (371) MHRGQRPFKCEQCDKSYGLKRDLEHQVLSHGEKPFVCDICGKAFARRPSLRVHREIHR  
 Homo sapiens\_ZNF408 (402) GHRGVRFPCPCQDKAYGTQRDLKEHQVVHSGARPFACDQCGKAFARRPSLRRLHRKTHQV

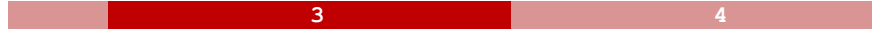

481 540  
 Daniorerio\_znf408 (431) KEPDYQALKVKCEPCDKELANSGSLRNHMLRHTGERPHICPHCNKCFRQGNLQGHMRIH  
 Homosapiens\_ZNF408 (462) PAAP---APCPCPVCGRFLANQGSRLNHMLRHTGERKFLCPHCGRAFQKRGNLRGHLRLH

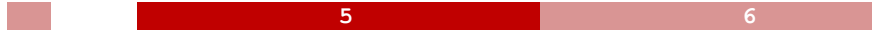

541 600  
 Danio rerio\_znf408 (491) TGEKPYRCDHCDLRFSCVPELRRHLISHTGEVYLCPCVCGKALRDPHTLRAHERLHTGDRP  
 Homo sapiens\_ZNF408 (519) TGERPYRCPHCADAFPCVPELRRHLISHTGEAHLCPVCGKALRDPHTLRAHERLHSCERP

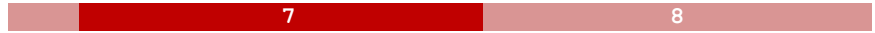

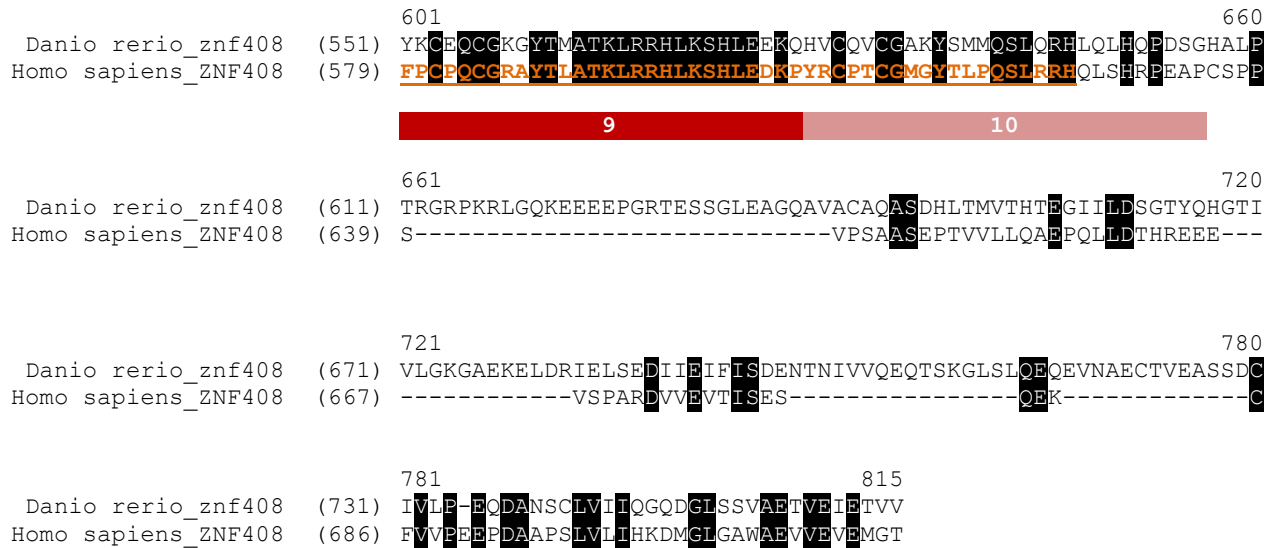

**Figure S1. Sequence alignment of human ZNF408 protein with zebrafish znf408 protein.**

Identical residues in all sequences are white on a black background. The predicted domains of znf408 protein are indicated. The epitope of the znf408 antibody used in this manuscript is indicated by orange color and underline.
