# Supplementary material for: Modeling ZNF408-Associated FEVR in Zebrafish Results in Abnormal Retinal Vasculature
Source: PubMed Central journal article supplement — Invest Ophthalmol Vis Sci. 2020 Feb 25;61(2):39. doi: 10.1167/iovs.61.2.39 (PMC7329629; doi:10.1167/iovs.61.2.39), 2020-02-25
Supplement: iovs-61-2-39_s002.pdf [file iovs-61-2-39_s002.pdf]

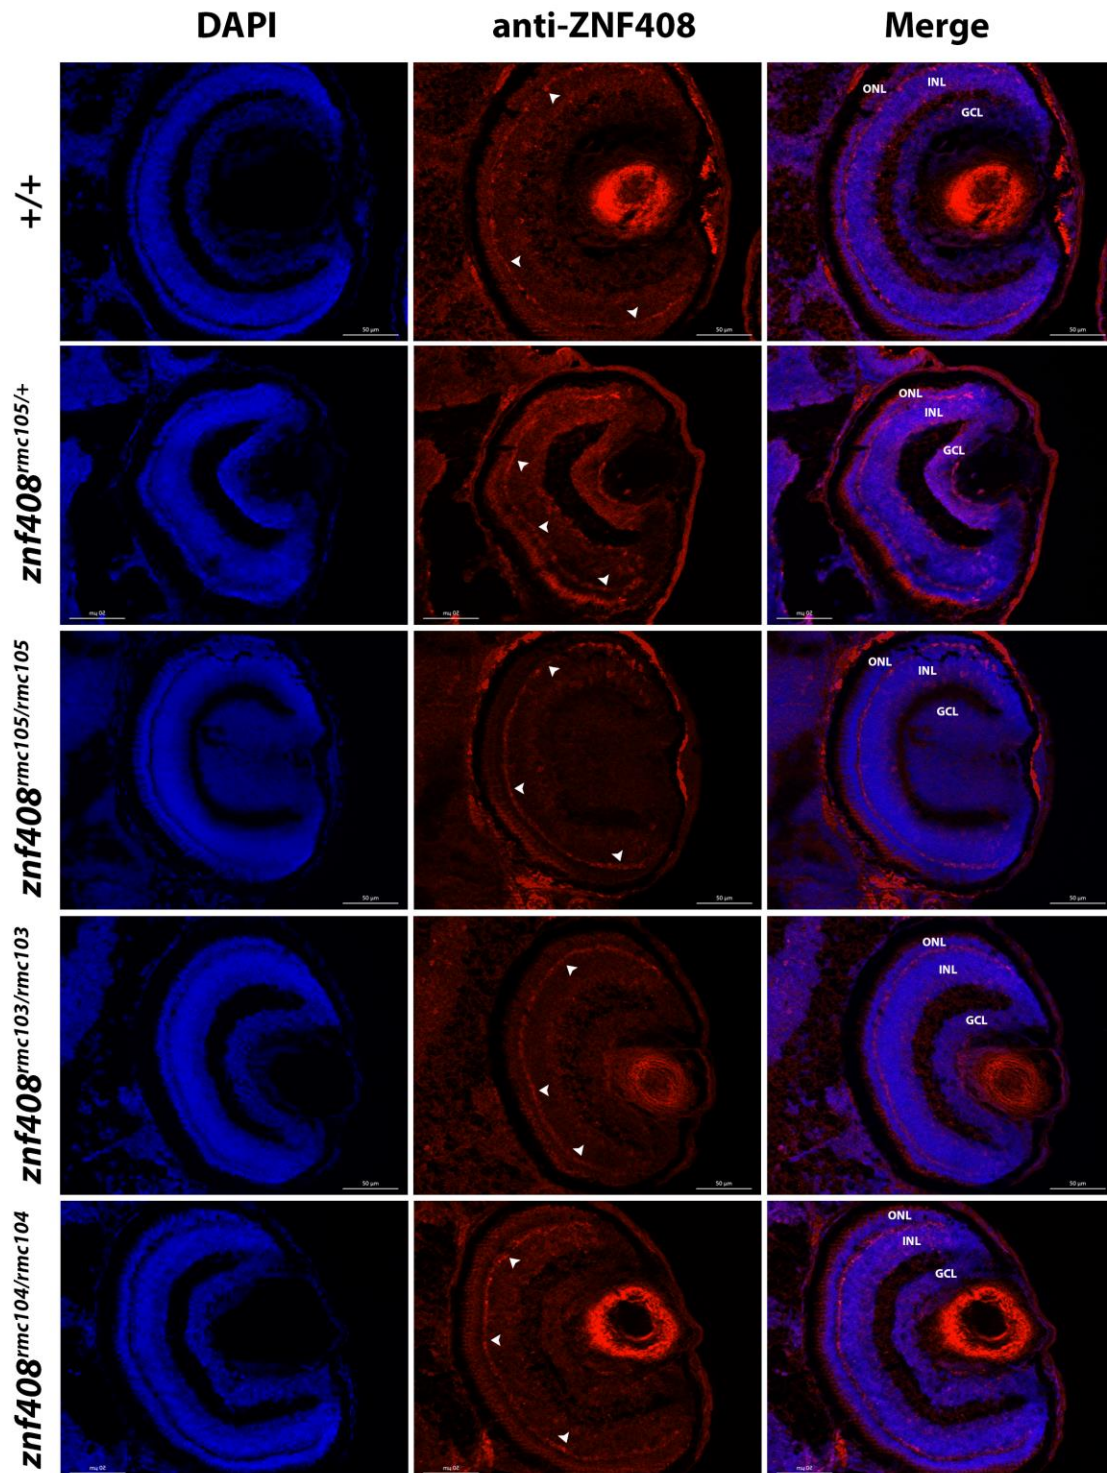

Figure S2. Immunostaining showed signals corresponding to *znf408* in the outer plexiform layer and can be detected in wild type and mutant larvae at 5 dpf.

The signals that are thought to represent *znf408* is indicated with white arrowheads and the three nuclear layers of the retina are denoted. The detection of the signal in the truncated mutant larvae renders the results as doubtful. Scale bar is 50  $\mu\text{m}$ .
