# Supplementary material for: Modeling ZNF408-Associated FEVR in Zebrafish Results in Abnormal Retinal Vasculature
Source: PubMed Central journal article supplement — Invest Ophthalmol Vis Sci. 2020 Feb 25;61(2):39. doi: 10.1167/iovs.61.2.39 (PMC7329629; doi:10.1167/iovs.61.2.39), 2020-02-25
Supplement: iovs-61-2-39_s003.pdf [file iovs-61-2-39_s003.pdf]

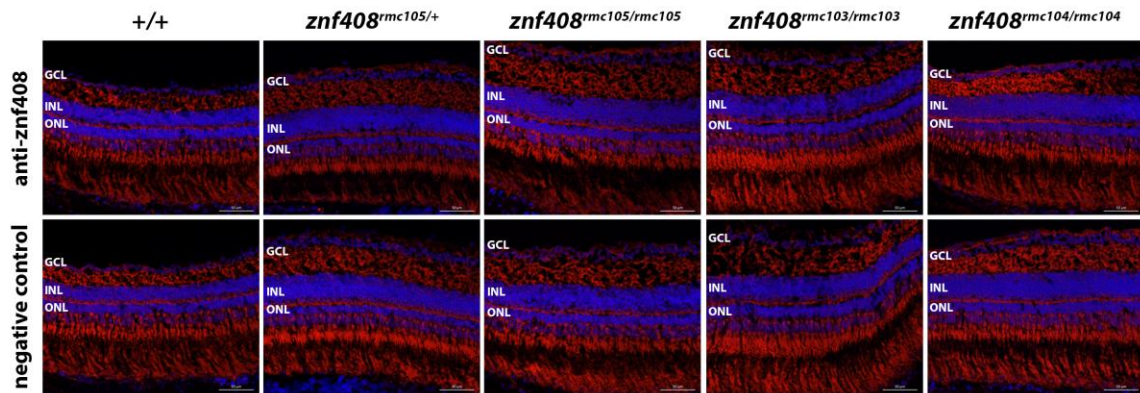

**Figure S3. Znf408 was not detectable in the eyes of 90 dpf fish by immunostaining.**

A representative image per condition is shown and compared to the negative controls, i.e. sections that are only treated with secondary antibody. Scale bar is 50  $\mu\text{m}$ .
