# Supplementary material for: Modeling ZNF408-Associated FEVR in Zebrafish Results in Abnormal Retinal Vasculature
Source: PubMed Central journal article supplement — Invest Ophthalmol Vis Sci. 2020 Feb 25;61(2):39. doi: 10.1167/iovs.61.2.39 (PMC7329629; doi:10.1167/iovs.61.2.39), 2020-02-25
Supplement: iovs-61-2-39_s004.pdf [file iovs-61-2-39_s004.pdf]

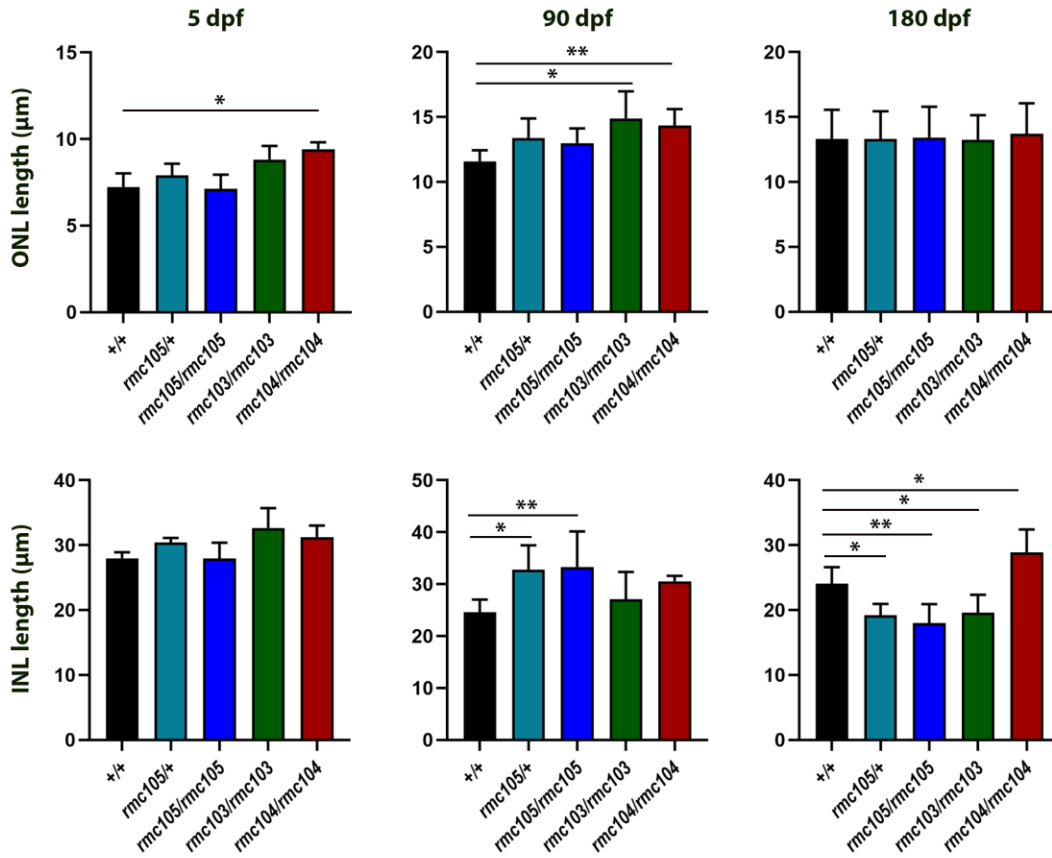

**Figure S4. Outer and inner nuclear layer thickness in larvae and adult *znf408*-mutant zebrafish.**

Measurement of outer nuclear layer (ONL) and inner nuclear layer (INL) in wild-type and mutant larvae. For each condition, at least 3 sections were analyzed. \*:p<0.05, \*\*:p<0.01.
