# Supplementary material for: Modeling ZNF408-Associated FEVR in Zebrafish Results in Abnormal Retinal Vasculature
Source: PubMed Central journal article supplement — Invest Ophthalmol Vis Sci. 2020 Feb 25;61(2):39. doi: 10.1167/iovs.61.2.39 (PMC7329629; doi:10.1167/iovs.61.2.39), 2020-02-25
Supplement: iovs-61-2-39_s005.pdf [file iovs-61-2-39_s005.pdf]

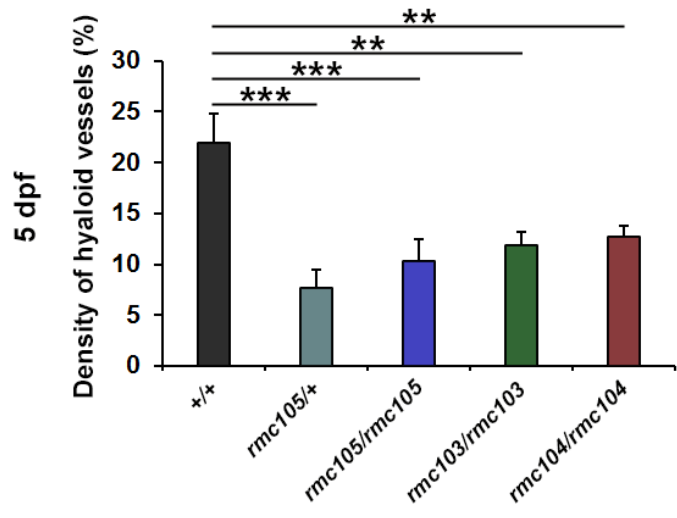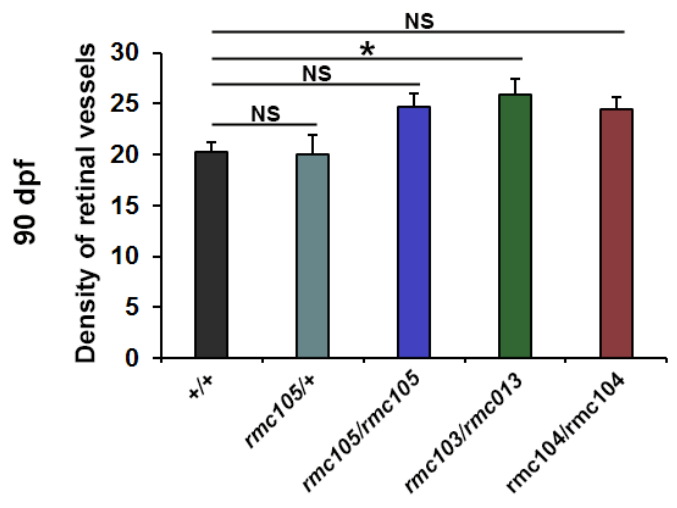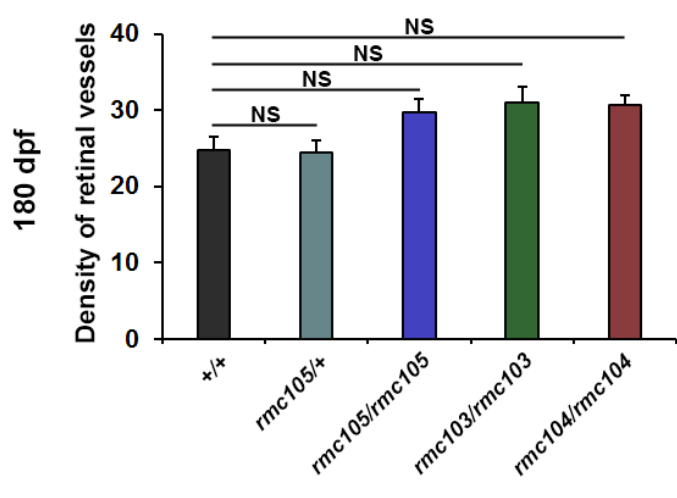

**Figure S5. Znf408-mutant zebrafish larvae have lower density of hyaloid vasculature, compared to wild type fish.** Quantification of hyaloid and retinal vasculature at 5, 90, and 180 dpf. n=10, ANOVA:  $p < 0.001$ , Dunnett's post hoc: \*\*\*:  $p < 0.001$ .
